# Supplementary material for: Exosome-Based Cell Homing and Angiogenic Differentiation for Dental Pulp Regeneration
Source: MDPI journal article supplement (doi:10.3390/ijms24010466), 2022-12-27
Supplement: s1 [file s1]

Supplementary Table S1. List of novel miRNAs in Exo-G.

| miRDeep<br>2 score | Consensus Mature sequence | Total<br>read<br>counts | Chromosome   | Start     | Stop      | Strand |
|--------------------|---------------------------|-------------------------|--------------|-----------|-----------|--------|
| 3379.5             | GCTGTGATGGCCGAGTGG        | 6656                    | 11           | 30795998  | 30796065  | +      |
| 1604.3             | GAAGTCGCAGCTCTCTGGGC      | 3143                    | 14           | 163848014 | 163848071 | -      |
| 1017.7             | GGGGATGTAGCTCAGTGG        | 2002                    | 11           | 31944616  | 31944678  | +      |
| 694.5              | TCAAAAAGTCGGCGGGAATGC     | 1359                    | GL018776     | 1023377   | 1023447   | -      |
| 590.5              | AGCCAGCTCTGTGGCGCAGTGG    | 1164                    | 7            | 34972538  | 34972589  | +      |
| 350                | TTCCTGTGCTGTTCTCGGTAG     | 684                     | GL018700     | 9256430   | 9256486   | -      |
| 350                | TTCCTGTGCTGTTCTCGGTAG     | 684                     | GL018700     | 9286959   | 9287015   | -      |
| 344                | TTCCTGTGCTGTTCTCGGTAG     | 672                     | GL018700     | 9253158   | 9253214   | -      |
| 343.9              | TTCCTGTGCTGTTCTCGGTAG     | 672                     | GL018700     | 9246701   | 9246757   | -      |
| 343.9              | TTCCTGTGCTGTTCTCGGTAG     | 672                     | GL018700     | 9272391   | 9272447   | -      |
| 242.1              | TGGGAACCTTGGGCAGGAAGT     | 471                     | GL018789     | 1006726   | 1006784   | -      |
| 198.6              | GTGACCTGTGGTGTGGTGG       | 394                     | GL018724     | 1521599   | 1521649   | -      |
| 196.9              | TACTCAGAGCGGGACTGGAATGT   | 383                     | GL018700     | 9301745   | 9301801   | -      |
| 196.8              | TACTCAGAGCGGGACTGGAATGT   | 383                     | GL018700     | 9297778   | 9297834   | -      |
| 176.4              | TTGGCTGAGACAGTGTGACAT     | 343                     | 12           | 148107814 | 148107872 | +      |
| 174.9              | TACCTAGAACAGCAACGGAGTGT   | 341                     | GL018700     | 9249628   | 9249684   | -      |
| 150                | TACCTAGAACAGCAACGGAGTGT   | 292                     | GL018700     | 9259730   | 9259786   | -      |
| 135.4              | ACCGCGTCTCCGCTCCCCGCAG    | 269                     | 15           | 76135699  | 76135759  | -      |
| 127.7              | TTCTGGGCAGGCATCGCGCTGG    | 254                     | GL018928     | 57136     | 57193     | +      |
| 125.4              | AGGGGCTGGCACTGTGGCAT      | 252                     | GL018822     | 301512    | 301571    | +      |
| 108.6              | TGTCTCTGTGCACTTCCCAGG     | 219                     | 17           | 81223265  | 81223340  | -      |
| 72.3               | TGCCTGTGCCCCCTTGGGAGTCT   | 146                     | AAGW02083711 | 3744      | 3803      | -      |
| 72.3               | TGCCTGTGCCCCCTTGGGAGTCT   | 146                     | AAGW02083842 | 3863      | 3922      | -      |
| 72.3               | TGCCTGTGCCCCCTTGGGAGTCT   | 146                     | GL019111     | 106599    | 106658    | -      |
| 72.3               | TGCCTGTGCCCCCTTGGGAGTCT   | 146                     | GL019111     | 136410    | 136469    | -      |
| 64.1               | TGCAGGAACAAGCATGTGTAT     | 123                     | 5            | 36025250  | 36025306  | +      |
| 58                 | AGGGGCCAGTGCTGTGGTGTAG    | 110                     | 7            | 13262868  | 13262944  | +      |
| 57                 | TGTGGGGACCATTGTTGAGTGC    | 118                     | 17           | 73354107  | 73354166  | +      |
| 52.9               | CCGTGACCGAGAGCGAGAACGA    | 101                     | 19           | 43996541  | 43996610  | +      |
| 47.4               | TTCCTGTGCTGTTCTGGGTAG     | 90                      | GL018700     | 9242143   | 9242199   | -      |
| 47.1               | TGACTGCAGTGCCAGTGTCCCAT   | 90                      | 14           | 153930371 | 153930428 | +      |
| 46.3               | TTCTGCCTGTGTAAGGAATGC     | 99                      | 17           | 11866993  | 11867054  | +      |
| 46                 | GAAGCGTAGGCGTGCTGGTGG     | 94                      | AAGW02083711 | 3160      | 3217      | -      |
| 45.5               | GAAGCGTAGGCGTGCTGGTGG     | 93                      | AAGW02083842 | 3276      | 3332      | -      |
| 45.5               | GAAGCGTAGGCGTGCTGGTGG     | 93                      | GL019111     | 106017    | 106073    | -      |
| 39                 | ATGATTTTCAGCTAAGAATGG     | 74                      | 7            | 99353953  | 99354012  | -      |
| 37.4               | TTCCTGGAACGCTCGGGGAGC     | 70                      | GL018725     | 923382    | 923437    | -      |
| 37.1               | AGGGGCTGGCACTGTGGCAC      | 80                      | GL019312     | 53901     | 53961     | -      |
| 35.8               | TGGAACCAGGACCTGCGGGGGC    | 66                      | AAGW02082842 | 671       | 727       | -      |
| 32.7               | TTGGGACTGGTGTGCGACG       | 61                      | 2            | 83442936  | 83442996  | -      |
| 32.4               | AGGGACTGGCTCTGTGGCG       | 69                      | 12           | 87153697  | 87153757  | -      |
| 30.6               | TGGCCTGCAGTGCTGGCATCCT    | 58                      | 19           | 31771015  | 31771069  | +      |
| 29.6               | TAAGGGCTGGCGATGTGGCAT     | 55                      | GL018717     | 1575634   | 1575696   | +      |

|      |                           |    |              |           |           |   |
|------|---------------------------|----|--------------|-----------|-----------|---|
| 26.6 | TCACCACCAAGGAACCAACCAC    | 48 | 4            | 35492486  | 35492547  | + |
| 24.5 | TACCTAGAACAGCAATGGAGTGT   | 49 | GL018700     | 9263075   | 9263130   | - |
| 22.5 | GAAGGTGGCCTGCCCTGTTCT     | 41 | GL019134     | 104104    | 104165    | - |
| 21.3 | ACACAACATTGAAGGAGGAAT     | 52 | 19           | 25357266  | 25357324  | + |
| 21   | CACCTGCAGTGCCGGCATCCCAT   | 40 | 17           | 49336057  | 49336114  | + |
| 20.4 | TTGGGGCTGGCACTGTGGCAT     | 38 | 17           | 8009414   | 8009472   | + |
| 17.9 | CGCAGGTCTGGGGTCTGAGCTGC   | 32 | GL019162     | 55775     | 55837     | - |
| 17   | TGCAGTATGGGCCCCGTCCTG     | 30 | GL019015     | 38527     | 38585     | + |
| 16.7 | CCACCTGCAGTGCTGGCATCCC    | 30 | 9            | 36322677  | 36322732  | + |
| 16.5 | TACTCAGAGAGGCACTGGCATGT   | 29 | GL018700     | 9301076   | 9301132   | - |
| 16.2 | ACGGTCCTCTGCCCCACTCAG     | 36 | 9            | 99528136  | 99528196  | + |
| 15.4 | TGGGAGACAGCAGAGAGAGGCT    | 28 | 2            | 130747420 | 130747482 | + |
| 15   | AGGGGTGAGCCCCACAGAGTCT    | 35 | 12           | 20787416  | 20787486  | - |
| 14.3 | CTTGCTTTGCACTTGGGGGTT     | 24 | X            | 108854306 | 108854365 | - |
| 13.3 | TTGACCGAGGATCTGCCCCAG     | 23 | 13           | 138301007 | 138301069 | + |
| 12.5 | TTCTAGCAGTGCCGGCACCCCAT   | 22 | 11           | 65211194  | 65211252  | + |
| 12.5 | GCGGAGCAGGTCTTGATCAT      | 21 | 19           | 19424456  | 19424516  | - |
| 12.4 | GATGGGAGTCAGTGGCCGTGG     | 21 | 21           | 12776073  | 12776128  | + |
| 12.3 | TGAGAGTGGGTCAAGTC         | 33 | 7            | 122613332 | 122613382 | - |
| 12.2 | CAAGGCTGGGAGATGCTCTGA     | 21 | 10           | 10979171  | 10979231  | - |
| 12.2 | CACCTGCAGTGCCGGCATCCCAT   | 31 | 12           | 45037872  | 45037930  | - |
| 12.1 | TGCATCACATTGCCAGTCCTGA    | 21 | 10           | 16906372  | 16906438  | - |
| 11.3 | CTTGCTGTGGCTGCCCCAGGTC    | 27 | 2            | 83422922  | 83422981  | - |
| 11.3 | ACCACACGGGGCACCGCCGGGCTGG | 26 | GL018914     | 202622    | 202684    | + |
| 10.9 | TGGGGCTGCCTGCCATGTGTGG    | 26 | AAGW02083711 | 4853      | 4907      | - |
| 10.1 | TTGAGGGCATCTTAAGAGAGGA    | 19 | 1            | 190847846 | 190847913 | + |
| 9.6  | CAAAAGTTCATGGAAGTGGAAG    | 16 | 14           | 104692557 | 104692613 | + |
| 7.3  | GGGCTGTATGTGTGCTTTTGC     | 13 | 1            | 70076462  | 70076522  | - |
| 7.2  | GGGGCTGGCGCTGTGGTGCAG     | 11 | 7            | 166406071 | 166406125 | - |
| 7.2  | AGGGCCGGCACTGTAGTATAGT    | 11 | X            | 47659871  | 47659926  | + |
| 7.2  | AGACAGGAAGGGTGTGTCTGT     | 11 | GL019171     | 65160     | 65234     | - |
| 6.9  | CAATCAGCCTACTGGGAACAT     | 26 | 1            | 123190047 | 123190103 | + |
| 6.8  | TCTGTCTGCCCTCCGCTTGCT     | 10 | 9            | 7084950   | 7085008   | - |
| 6.7  | ACCTGCATGTTAGTCTAATGTTCTG | 11 | 4            | 77890296  | 77890385  | + |
| 6.3  | CCCACCCACCCCTGTGAGATCG    | 8  | GL018940     | 47229     | 47287     | - |
| 5.3  | TGACCCCCGGCCGGACCCAC      | 6  | 4            | 84827251  | 84827317  | - |
| 5.2  | AAGGGATCGGCATTCTGGCAT     | 9  | 1            | 184713261 | 184713319 | - |
| 5.2  | AGTCCAGGGCTTAGTCAGCGG     | 7  | 15           | 50955589  | 50955648  | + |
| 5    | TCGTATCCACCTCTGTTGCAG     | 19 | GL018831     | 47863     | 47943     | + |
| 5    | ATCATGTATGATACTGCACACA    | 14 | GL019074     | 61059     | 61121     | + |
| 4.5  | TATTCAAGCCCAGCGGAGGTAC    | 5  | 2            | 159928226 | 159928285 | + |
| 4.5  | TATGTTTGCTGTTTTGTGAGAC    | 10 | 7            | 172929928 | 172929992 | - |
| 4.4  | CCCCAAGGACACTGCCTGCCTAC   | 5  | 10           | 45287368  | 45287427  | + |
| 4.4  | TAGGGAGAGAATGAGTGGACTGA   | 8  | 20           | 30157180  | 30157238  | + |
| 4.2  | GTCGCACGCACGCCCGCCTCGG    | 12 | 1            | 130454171 | 130454237 | - |

Supplementary Table S2. List of novel miRNAs in Exo-A.

| miRDeep<br>2 score | Consensus Mature sequence | Total<br>read<br>counts | Chromosome | Start     | Stop      | Strand |
|--------------------|---------------------------|-------------------------|------------|-----------|-----------|--------|
| 64482              | GGTGCTGTAGGCTTTAAA        | 126510                  | 19         | 54756247  | 54756283  | +      |
| 486.7              | GAAGTCGCAGCTCTCTGGGC      | 951                     | 14         | 163848014 | 163848071 | -      |
| 282.1              | GTCTGAGCGGCGGCCACT        | 559                     | 13         | 110485608 | 110485664 | +      |
| 251.8              | TGTCTCCTGTGCACTTCCCAGG    | 500                     | 17         | 81223265  | 81223340  | -      |
| 220.8              | TCAAAAAGTCGGCGGGAAATGC    | 430                     | GL018776   | 1023380   | 1023447   | -      |
| 70.2               | CCGTGACCGAGAGCGAGAACGA    | 135                     | 19         | 43996541  | 43996610  | +      |
| 62.9               | TTCCTGTGCTGTTCTCGGTAG     | 121                     | GL018700   | 9256430   | 9256486   | -      |
| 62.9               | TTCCTGTGCTGTTCTCGGTAG     | 121                     | GL018700   | 9286959   | 9287015   | -      |
| 47.7               | TCAAAGGAAGAAGACTGGCGT     | 91                      | 11         | 3609112   | 3609171   | +      |
| 44.9               | TTGGCTGAGACAGTGTGACAT     | 85                      | 12         | 148107814 | 148107871 | +      |
| 25.8               | CAATCAGCCTACTGGGAACAT     | 63                      | 1          | 123190047 | 123190103 | +      |
| 20.6               | AGGGGTGAGCCCCACAGAGTCT    | 46                      | 12         | 20787417  | 20787486  | -      |
| 17.5               | TGGGCCACAGAGACTCTGG       | 31                      | GL018897   | 256545    | 256602    | -      |
| 17.4               | TTCCTGTGCTGCTCTGAGTAG     | 40                      | GL018700   | 9249628   | 9249684   | -      |
| 17.3               | CCTAGAGTGTGCGCATCCCTTT    | 40                      | GL018822   | 301512    | 301571    | +      |
| 16.8               | TTCTGCCTGTGTAAGGAATGC     | 41                      | 17         | 11866993  | 11867054  | +      |
| 15.7               | ATCATGTATGATACTGCACACA    | 35                      | GL019074   | 61059     | 61121     | +      |
| 13.7               | TGTGGGGACCATTGTTGAGTGC    | 33                      | 17         | 73354107  | 73354166  | +      |
| 13.3               | CGCAGGTCTGGGGTCTGAGCTGC   | 23                      | GL019162   | 55776     | 55837     | -      |
| 13                 | ATGATTTTCAGCTAAGAATGG     | 23                      | 7          | 99353950  | 99354012  | -      |
| 11.6               | GTGTATGATGACTGGATT        | 20                      | GL018725   | 3255292   | 3255368   | +      |
| 10.9               | GCGGAGCAGGTCTTGATCAT      | 18                      | 19         | 19424457  | 19424516  | -      |
| 10.8               | TACTCAGAGCGGGACTGGAATGT   | 18                      | GL018700   | 9301745   | 9301801   | -      |
| 10.7               | TACTCAGAGCGGGACTGGAATGT   | 18                      | GL018700   | 9297778   | 9297834   | -      |
| 9.9                | CATCCAGAAGTCCAGGGACTTT    | 20                      | GL018705   | 625149    | 625204    | +      |
| 9.8                | TTCCTGGAACGCTCGGGGAGC     | 16                      | GL018725   | 923381    | 923437    | -      |
| 8.8                | TACCTAGAACAGCAACGGAGTGT   | 15                      | GL018700   | 9259730   | 9259786   | -      |
| 6.9                | TGAACCTGTGATGCCAGCATCC    | 10                      | 8          | 33724831  | 33724887  | -      |
| 6                  | TATGTTTGCTGTTTTGTGAGAC    | 13                      | 7          | 172929928 | 172929992 | -      |
| 6                  | CTTCCTGGCTGACGTGGAGTCC    | 8                       | 20         | 9171823   | 9171886   | +      |
| 5.7                | GGCAGGGCCTGCTTCCTTCC      | 8                       | GL019134   | 104104    | 104165    | -      |
| 5.2                | CGTCTGGGCTGGCCCGAGCG      | 14                      | GL019068   | 92002     | 92058     | -      |
| 5.1                | TACCTAGAACAGCAATGGAGTGT   | 7                       | GL018700   | 9242142   | 9242199   | -      |
| 5                  | CCTCTGCACTCTCTCTACCAG     | 14                      | GL018821   | 265484    | 265554    | -      |
| 4.4                | TCTGGCTTCAAGGTGCTGTGT     | 5                       | GL018725   | 2252226   | 2252285   | -      |
| 4.1                | ACACAGCAGACTCAGAGG        | 9                       | 14         | 122355007 | 122355074 | +      |
